# Supplementary material for: Knowledge about Diabetes and Glycemic Control among Diabetic Patients in Saudi Arabia
Source: Hindawi journal article supplement (doi:10.1155/2020/1239735), 2020-03-07
Supplement: f1 [file 1239735.f1.pdf]

## APPENDICES

**Table A1-** Questionnaire used for collection of demographic data of the participants  
(English).

| Choose the answer you think is correct by marking (✓) in the space (only one answer per question) |                             |              |                  |                 |                  |             |
|---------------------------------------------------------------------------------------------------|-----------------------------|--------------|------------------|-----------------|------------------|-------------|
| 1                                                                                                 | Gender                      | Male         | Female           |                 |                  |             |
|                                                                                                   |                             | 0            | 1                |                 |                  |             |
| 2                                                                                                 | Age/years                   | -----years   |                  |                 |                  |             |
| 3                                                                                                 | Nationality                 | Saudi        | Non-Saudi        |                 |                  |             |
|                                                                                                   |                             | 0            | 1                |                 |                  |             |
| 4                                                                                                 | Marital status              | Married      | Not married      |                 |                  |             |
|                                                                                                   |                             | 0            | 1                |                 |                  |             |
| 5                                                                                                 | Job type:                   | Governmental | Non-governmental | Free businesses | Retired          | Not working |
|                                                                                                   |                             | 0            | 1                | 2               | 3                | 4           |
| 6                                                                                                 | Educational level:          | Primary      | Intermediate     | Secondary       | University       |             |
|                                                                                                   |                             | 0            | 1                | 2               | 3                |             |
| 7                                                                                                 | Duration of diabetes years: | -----years   |                  |                 |                  |             |
| 8                                                                                                 | Type of treatment :         | Diet only    | Oral             | Insulin only    | Oral and insulin |             |
|                                                                                                   |                             | 0            | 1                | 2               | 3                |             |
| 9                                                                                                 | Diabetes education s:       | Yes          | No               |                 |                  |             |
|                                                                                                   |                             | 0            | 1                |                 |                  |             |
| 10                                                                                                | Family                      | Yes          | No               |                 |                  |             |

|  |                                              |          |          |  |
|--|----------------------------------------------|----------|----------|--|
|  | <b>history of<br/>diabetes<br/>mellites:</b> | <b>0</b> | <b>1</b> |  |
|--|----------------------------------------------|----------|----------|--|

**Table A2-** Questionnaire used for collection of demographic data of the participants  
(Arabic).

| اختر الإجابة التي تعتقد أنها صحيحة بوضع علامة (✓) في الفراغ (إجابة واحدة فقط لكل سؤال). |                                         |          |             |               |
|-----------------------------------------------------------------------------------------|-----------------------------------------|----------|-------------|---------------|
|                                                                                         | الجنس:                                  |          | ذكر         | انثى          |
|                                                                                         |                                         |          | 0           | 1             |
|                                                                                         | العمر/بالسنوات:                         |          |             | ----- (سنة)   |
|                                                                                         | الجنسية:                                |          | سعودي       | مقيم          |
|                                                                                         |                                         |          | 0           | 1             |
|                                                                                         | الحالة الاجتماعية:                      |          | متزوج       | غير متزوج     |
|                                                                                         |                                         |          | 0           | 1             |
| 5                                                                                       | نوع الوظيفة:                            |          |             |               |
|                                                                                         | قطاع حكومي                              | قطاع خاص | اعمال حرة   | متقاعد        |
|                                                                                         | 0                                       | 1        | 2           | 3             |
| 6                                                                                       | المستوى التعليمي:                       |          |             |               |
|                                                                                         | ابتدائي او اقل                          | متوسط    | ثانوي       | جامعي         |
|                                                                                         | 0                                       | 1        | 2           | 3             |
| 7                                                                                       | مدة الإصابة بمرض السكري/<br>بالسنوات:   |          |             |               |
|                                                                                         | ----- (سنة)                             |          |             |               |
| 8                                                                                       | الطريقة التي تستعملها بالمعالجة:        |          |             |               |
|                                                                                         | حمية فقط                                | حبوب     | انسولين فقط | حبوب وانسولين |
|                                                                                         | 0                                       | 1        | 2           | 3             |
| 9                                                                                       | هل يوجد من أفراد أسرتك مصاب<br>بالسكري؟ |          |             |               |
|                                                                                         | نعم                                     | لا       |             |               |
|                                                                                         | 0                                       | 1        |             |               |
| 10                                                                                      | هل سبق تثقيفك عن داء السكري؟            |          |             |               |
|                                                                                         | نعم                                     | لا       |             |               |
|                                                                                         | 0                                       | 1        |             |               |

**Table A3-** The 14-item MDKT questionnaire, used for assessing patients’ general knowledge on diabetes, with correct answers marked with an asterisk (English).

| Michigan Diabetes Research and Training Center’s Revised Diabetes Knowledge Test                  |                                                                                |                                |                                           |                                             |                                                     |
|---------------------------------------------------------------------------------------------------|--------------------------------------------------------------------------------|--------------------------------|-------------------------------------------|---------------------------------------------|-----------------------------------------------------|
| Choose the answer you think is correct by marking (✓) in the space (only one answer per question) |                                                                                |                                |                                           |                                             |                                                     |
| 1                                                                                                 | The diabetes diet is:                                                          | the way most people eat        | a healthy diet for most people            | too high in carbohydrate for most people    | too high in protein for most people                 |
|                                                                                                   |                                                                                | 0                              | 1*                                        | 2                                           | 3                                                   |
| 2                                                                                                 | Which of the following is highest in carbohydrate?                             | Baked chicken                  | Swiss cheese                              | Baked potato                                | Peanut butter                                       |
|                                                                                                   |                                                                                | 0                              | 1                                         | 2*                                          | 3                                                   |
| 3                                                                                                 | Which of the following is highest in fat?                                      | Low fat (2%) milk              | Orange juice                              | Corn                                        | Honey                                               |
|                                                                                                   |                                                                                | 0*                             | 1                                         | 2                                           | 3                                                   |
| 4                                                                                                 | Which of the following is a “free food”?                                       | Any unsweetened food           | Any food that has “fat free” on the label | Any food that has “sugar free” on the label | Any food that has less than 20 calories per serving |
|                                                                                                   |                                                                                | 0                              | 1                                         | 2                                           | 3*                                                  |
| 5                                                                                                 | A1C is a measure of your average blood glucose level for the past:             | day                            | week                                      | 6-12 weeks                                  | 6 months                                            |
|                                                                                                   |                                                                                | 0                              | 1                                         | 2*                                          | 3                                                   |
| 6                                                                                                 | Which is the best method for home glucose testing?                             | Urine testing                  | Blood testing                             | Both are equally good                       |                                                     |
|                                                                                                   |                                                                                | 0                              | 1*                                        | 2                                           |                                                     |
| 7                                                                                                 | What effect does unsweetened fruit juice have on blood glucose?                | Lowers it                      | Raises it                                 | Has no effect                               |                                                     |
|                                                                                                   |                                                                                | 0                              | 1*                                        | 2                                           |                                                     |
| 8                                                                                                 | Which should <u>not</u> be used to treat a low blood glucose?                  | 3 hard candies                 | 1/2 cup orange juice                      | 1 cup diet soft drink                       | 1 cup skim milk                                     |
|                                                                                                   |                                                                                | 0                              | 1                                         | 2*                                          | 3                                                   |
| 9                                                                                                 | For a person in good control, what effect does exercise have on blood glucose? | Lowers it                      | Raises it                                 | Has no effect                               |                                                     |
|                                                                                                   |                                                                                | 0*                             | 1                                         | 2                                           |                                                     |
| 10                                                                                                | What effect will an infection most likely have on blood glucose?               | Raises it                      | Lowers it                                 | Has no effect                               |                                                     |
|                                                                                                   |                                                                                | 0*                             | 1                                         | 2                                           |                                                     |
| 11                                                                                                | The best way to take care of your feet is to:                                  | look at and wash them each day | massage them with alcohol each day        | soak them for one hour each day             | buy shoes a size larger than usual                  |
|                                                                                                   |                                                                                | 0*                             | 1                                         | 2                                           | 3                                                   |
| 12                                                                                                | Eating foods lower in fat decreases your risk for:                             | nerve disease                  | kidney disease                            | heart disease                               | eye disease                                         |
|                                                                                                   |                                                                                | 0                              | 1                                         | 2*                                          | 3                                                   |
| 13                                                                                                | Numbness and tingling may be symptoms of:                                      | kidney disease                 | nerve disease                             | eye disease                                 | liver disease                                       |
|                                                                                                   |                                                                                | 0                              | 1*                                        | 2                                           | 3                                                   |
| 14                                                                                                | Which of the following is usually <u>not</u> associated with diabetes?         | vision problems                | kidney problems                           | nerve problems                              | lung problems                                       |
|                                                                                                   |                                                                                | 0                              | 1                                         | 2                                           | 3*                                                  |
